# Supplementary material for: Functional Traits Plasticity of the Invasive Herb Argemone ochroleuca Sweet in Different Arid Habitats
Source: MDPI journal article supplement (doi:10.3390/plants9101268), 2020-09-26
Supplement: s1 [file s1]

# Functional Traits Plasticity of the Invasive Herb *Argemone ochroleuca* Sweet in Different Arid Habitats

Abdulaziz M. Assaeed <sup>1</sup>, Saud L. Al-Rowaily <sup>1</sup>, Magdy I. El-Bana <sup>2</sup>, Ahmad K. Hegazy <sup>3</sup>, Basharat A. Dar <sup>1</sup> and Ahmed M. Abd-ElGawad <sup>1,4,\*</sup>

<sup>1</sup> Plant Production Department, College of Food & Agriculture Sciences, King Saud University, P.O. Box 2460, Riyadh 11451, Saudi Arabia; assaeed@ksu.edu.sa (A.M.A.); srowaily@ksu.edu.sa (S.L.A.-R.); baseratali@gmail.com (B.A.D.)

<sup>2</sup> Botany Department, Faculty of Science, Port Said University, Port Said 42511, Egypt; magdyelbana@sci.psu.edu.eg

<sup>3</sup> Department of Botany and Microbiology, Faculty of Science, University of Cairo, Giza 12613, Egypt; hegazy@sci.cu.edu.eg

<sup>4</sup> Department of Botany, Faculty of Science, Mansoura University, Mansoura 35516, Egypt

\* Correspondence: aibrahim2@ksu.edu.sa; Tel.: +966-562-680-864

Received: 1 September 2020; Accepted: 24 September 2020; Published: 26 September 2020

## Supplementary Materials

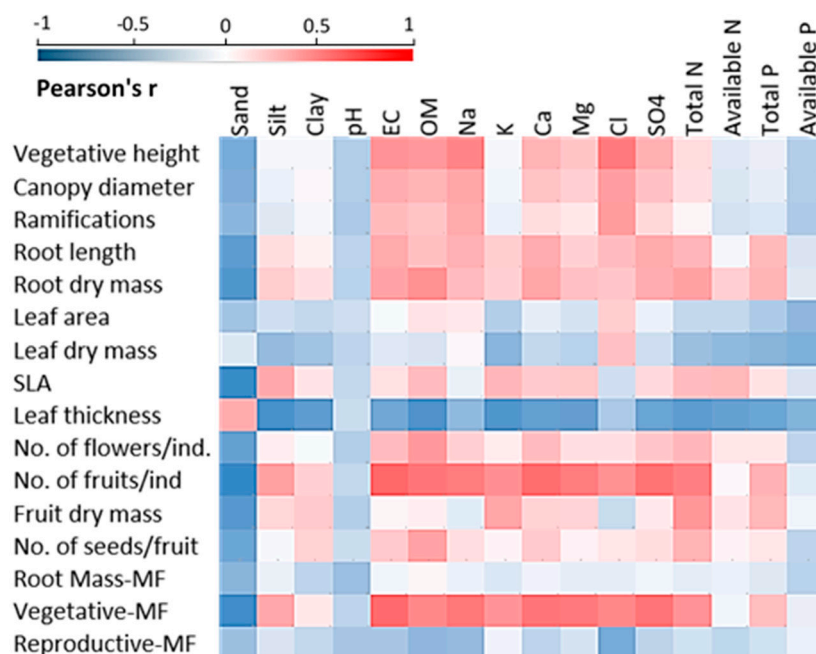

**Figure S1.** Pearson's correlation heatmaps between the soil variables and the functional traits of *Argemone ochroleuca* in various studied habitats. EC: electrical conductivity, OM: organic matter, SLA: specific leaf area.
